# Supplementary material for: Vegetation controls on maximum coastal foredune hummockiness and annealing time
Source: Copernicus journal article supplement (doi:10.5194/esurf-2017-2), 2017-01-19
Supplement: Supplementary file [file esurf-2017-2-AC2-supplement.pdf]

## Response to Reviewer 1

Reviewer comments in plain text

Author comments are in **BOLD**

ESurfd Manuscript text is in *italics*

Added Text is in ***Bold Italics***

**We thank Referee #1 for taking the time to read and review our manuscript. We address each specific comment below:**

General Comments:

This paper makes use of a model to examine the way growth of vegetation leads to development of a continuous foredune ridge. The paper could use a better balance in its presentation of the need for the model and its application to resolve the research issues. The research issues where the model can potentially be of use are now introduced in better detail in the discussion and implications section. Godfrey has already explained much of the reason for hummockiness. His work should be presented in detail up front and discussed in terms of modern needs to demonstrate that there is a need to subject his insightful conceptual model to a test. The discussion of the mechanics of the model occupies most of the paper. The results section is actually an extension of the methods because it tell how the model is to be used rather than what use of the model tells us.

**We have now clarified the text of the paper to explain how our focus is on quantitative, predictive rules compared to the observational work that was done in the 1970s.**

**In the Abstract (Page 1 Line 15-21):**

***“Model results yield a predictive rule for the timescale of coalescing and the height of the coalesced dune that depends on initial plant dispersal and two parameters that control the lateral and vertical growth of vegetation, respectively. Our findings agree with previous observational and conceptual work — whether or not hummockiness will be maintained depends on the time scale of coalescing relative to the recurrence interval of high water events that reset dune-building in low areas between hummocks. Additionally, our model reproduces the observed tendency for foredunes to be hummocky along the southeast coast of the U.S. where lateral vegetation growth rates, and thus coalescing times, are likely longer. “***

**Page 2 Line 32 to Page 3 Line 6**

***“In this contribution we develop and explore a model of coastal foredune growth and hummocky dune evolution —that is consistent with this previous work — to better understand the mechanisms behind the development of hummocky foredunes in the alongshore direction. Previous work by Moore et al (2016) has investigated the cross-shore dynamics. Our work here is a quantitative investigation of several of the hypotheses of Godfrey (1977), notably that vegetation exerts a fundamental control on alongshore dune morphology. Our findings suggest that, given no pre-existing template and sufficient time prior to occurrence of a storm event, alongshore hummocky dunes eventually coalesce to form a continuous coastal foredune ridge. Model results are well explained by a predictive rule for both the coalescing timescale and the height of the coalesced dune that depend on the initial spatial distribution of dune vegetation***

*(which controls the location of incipient dunes), and the lateral and vertical growth rate of vegetation.”*

**We also include additional references to Godfrey in the introduction:**

**Page 2 Line 13-18:**

*“Geological and geomorphic templates have also been used to explain variability in dune height. Low areas without dunes can remain low because of shell or coarse-grained lags, a high water table that causes plant stress, **and/or climatic conditions such as cold temperatures prohibiting plant growth** (e.g., Mountney and Russell, 2006; 2009; Wolner et al., 2012; Ruz and Hesp, 2014; Ruz et al., 2017a). **Godfrey (1977) hypothesized that barrier island orientation relative to the prevailing winds exerts a control on foredune morphology, with taller dunes occurring when winds blow directly onshore, perpendicular to the shoreline.**”*

**Page 2 Line 23-31**

*“Ritchie and Penland (1988a, 1988b, 1990) developed a conceptual model of coastal foredune development following flattening of foredune topography by a storm, stating that a mature, continuous foredune can develop from a washover terrace given sufficient time. The transition from washover terrace (a low surface) to a continuous dune requires individual incipient dunes to grow and merge, eventually developing into a single continuous ridge. (Ritchie and Penland, 1988; 1990; Pye, 1983; Carter and Wilson 1990; Davidson-Arnott and Fisher, 1992; Mathew et al., 2010; Montreuil et al., 2013). Such a conceptual model, consistent with widely observed field conditions, **does not address** why some initially hummocky foredunes coalesce to a linear foredune ridge, while others remain hummocky, having variable dune height in the alongshore direction, **though Godfrey (1977) discussed the potential for recurring storm events to prevent the coalescing of hummocky dunes, even in locations where vegetation grows rapidly in the lateral direction.**”*

**Page 3 Line 1-2:**

*“**Our work here is a quantitative investigation of several of the hypotheses of Godfrey (1977), notably that vegetation exerts a fundamental control on alongshore dune morphology.**”*

**We also add a citation to another Godfrey paper in the manuscript (Godfrey et al 1979)**

The conclusion that given sufficient time and lack of external forcing, hummocky dunes can form dune ridges seems self evident if the model is designed to get to this stage. What are the practical implications of this statement?

**The key result is the quantitative relationship, which is different that the conceptual work of Godfrey. We have modified our introduction to state this more clearly.**

**Page 2 Line 32 to Page 3 Line 6:**

*“In this contribution we develop and explore a model of coastal foredune growth and hummocky dune evolution—that is consistent with this previous work—to better understand the mechanisms behind the development of hummocky **foredunes in the alongshore direction.**”*

*Previous work by Moore et al (2016) has investigated the cross-shore dynamics. Our work here is a quantitative investigation of several of the hypotheses of Godfrey (1977), notably that vegetation exerts a fundamental control on alongshore dune morphology. Our findings suggest that, given no pre-existing template and sufficient time prior to occurrence of a storm event, alongshore hummocky dunes eventually coalesce to form a continuous coastal foredune ridge. Model results are well explained by a predictive rule for both the coalescing timescale and the height of the coalesced dune that depend on the initial spatial distribution of dune vegetation (which controls the location of incipient dunes), and the lateral and vertical growth rate of vegetation.”*

There is also a line in the abstract that discusses the predictive rule in our abstract:

**In the Abstract (Page 1 Line 15-21):**

*“Model results yield a predictive rule for the timescale of coalescing and the height of the coalesced dune that depends on initial plant dispersal and two parameters that control the lateral and vertical growth of vegetation, respectively. Our findings agree with previous observational and conceptual work — whether or not hummockiness will be maintained depends on the time scale of coalescing relative to the recurrence interval of high water events that reset dune-building in low areas between hummocks. Additionally, our model reproduces the observed tendency for foredunes to be hummocky along the southeast coast of the U.S. where lateral vegetation growth rates, and thus coalescing times, are likely longer. “*

Is there evidence that this kind of end stage can be achieved in nature, especially for species that now tend to form hummocky dunes and in light of sea level rise and potential increase in storminess?

**This is a good point. We now include several sentences regarding Sapelo Island, GA, USA as an example of a location where continuous dune ridges form even when the species that tend to form hummocky dunes are dominant.**

**Page 7 Line 17-21**

*“The dominant dune-building plant of the southeastern U.S. has a slower lateral growth rate and therefore a longer coalescing time, likely leading to the increased prevalence of hummocky foredunes in this region. Evidence that even *U. paniculata* can form continuous dune ridges is present on Sapelo Island, Georgia, U.S. The lack of a major hurricane strike in this region (Bossak et al., 2014) is manifest in the continuous ridge topography even though the foredune is dominated by *U. paniculata* (Monge and Stallins, 2016; Stallins 2005; Stallins and Parker, 2003).”*

Even *Ammophila*-dominated dunes may tend toward hummockiness rather than a linear form, with an increase in frequency/magnitude of storms. This concept is introduced at the end of the paper but not used to determine the applicability of the model or its use.

**We now discuss storm frequency in the introduction.**

**Page 2 Line 23-31**

*“Ritchie and Penland (1988a, 1988b, 1990) developed a conceptual model of coastal foredune development following flattening of foredune topography by a storm, stating that a mature, continuous foredune can develop from a washover terrace given sufficient time. The transition from washover terrace (a low surface) to a continuous dune requires individual incipient dunes to grow and merge, eventually developing into a single continuous ridge. (Ritchie and Penland, 1988; 1990; Pye, 1983; Carter and Wilson 1990; Davidson-Arnott and Fisher, 1992; Mathew et al., 2010; Montreuil et al., 2013). Such a conceptual model, consistent with widely observed field conditions, **does not address** why some initially hummocky foredunes coalesce to a linear foredune ridge, while others remain hummocky, having variable dune height in the alongshore direction, **though Godfrey (1977) discussed the potential for recurring storm events to prevent the coalescing of hummocky dunes, even in locations where vegetation grows rapidly in the lateral direction.**”*

**Although such an assessment is beyond the scope of this project, we have also added the following sentence at the end of the manuscript:**

**Page 8 Line 31-34:**

***“Although beyond the scope of this effort, observational work aimed at assessing the relationships among storm frequency/magnitude, species composition of dune-building vegetation and dune development (e.g., van Puijenbroek et al., 2017a; 2017b) will be useful in addressing the future implications of model results presented here as climate change is anticipated to alter each of these factors.”***

The word “annealing” is not intuitively obvious from a standard definition of the term. In any case, the word should be eliminated from the title, where it cannot be defined in the context used here.

**We have replaced all uses of the term ‘anneal’ (referring to closing of the gap between dunes), and its variants, with ‘coalesce’ (referring to merging of the dunes themselves, and therefore closing of the gap).**

The title should be reworded in any case. The paper is not actually about vegetation controls, which would involve a much more comprehensive discussion of growth patterns, rates, etc. related to specific vegetation types. The title should reflect the use of the model, if the model remains the primary focus of the paper.

**We have also changed the title of the manuscript:**

***Lateral vegetation growth rates exert control on coastal foredune “hummockiness” and coalescing time***

Specific comments:

Abstract The first sentence is misleading because this paper is not about building dunes for shore protection. The implication is that hummockiness is a bad thing, when it may represent a balanced geomorphic-ecologic condition.

**We have rewritten the first lines of the abstract to conform more to the paper:**

**Page 1 Line 10-11**

***“Coastal foredunes form along sandy, low-sloped coastlines and range in shape from continuous dune ridges to hummocky features, which are characterized by alongshore-variable dune crest elevations.”***

The goal expressed on lines 14 and 15 should be more specific to the paper because the causes and dynamics of hummocky foredunes have already been examined in terms of vegetation characteristics. Lines 18-19: Why not state the predictive rule right in the abstract and specifically identify the two parameters that control lateral and vertical vegetation growth? The findings and explanation for the findings identified in Lines 20-23 are already documented in the literature. More original findings of this study should be identified.

**We have rewritten the abstract to better explain that our work provides quantitative backing to the observation and conceptual work that has been done previously.**

**In the Abstract (Page 1 Line 15-21):**

***“Model results yield a predictive rule for the timescale of coalescing and the height of the coalesced dune that depends on initial plant dispersal and two parameters that control the lateral and vertical growth of vegetation, respectively. Our findings agree with previous observational and conceptual work — whether or not hummockiness will be maintained depends on the time scale of coalescing relative to the recurrence interval of high water events that reset dune-building in low areas between hummocks. Additionally, our model reproduces the observed tendency for foredunes to be hummocky along the southeast coast of the U.S. where lateral vegetation growth rates, and thus coalescing times, are likely longer. “***

First paragraph of the introduction: Coastal dunes can be initiated without colonizing plants. It may be useful to identify the starting condition for incipient dune formation (e.g. overwash), or is the discussion about new dunes forming seaward of an existing foredune?

**We agree that dunes can form without colonizing plant, that is why we use the word ‘can be initiated’ not ‘must be initiated’. We now modify the text to account for incipient dune formation after high water events:**

**Page 1 Line 29-30**

***“New coastal dunes can be initiated when there is sufficient cross-shore width seaward of the existing foredune for plants to colonize (e.g., Hesp, 2002), or when elevated water levels destroy existing dunes.”***

Discussion of the cross-shore component would be important in the shore protection context. The word “hummocky” is introduced, and apparently evaluated (Fig. 2) as a two-dimensional concept, but it has cross-shore expression as well. A sentence or two dismissing or assuming

away the cross-shore aspects should be inserted, but that may require eliminating the shore-protection context as well because volume is critical to shore protection.

**Thank you for pointing this out. The cross shore hummockiness was the focus of previous work (Moore et al 2016). We now highlight this at the end of the introduction:**

**Page 2 Line 32 -35:**

*“In this contribution we develop and explore a model of coastal foredune growth and hummocky dune evolution—that is consistent with this previous work—to better understand the mechanisms behind the development of hummocky **foredunes in the alongshore direction**. Previous work by Moore et al (2016) has investigated the cross-shore dynamics.”*

**The shore protection lines in the abstract have been removed**

First complete paragraph page 2 (beginning Line 8). This would be a good place to introduce the Godfrey model in greater detail and identify how this paper will expand or refine it.

Lines 26-28 on Page 2: This is not an open question, which is why the Godfrey model should be introduced in sufficient detail to identify what the remaining open question is and how the model can answer it.

**As discussed earlier, we have added several more references to Godfrey in the introduction, and explicitly discuss how this work relates to the work of Godfrey. We repeat the edits here to answer these two points:**

**Page 2 Line 32 to Page 3 Line 6**

*“In this contribution we develop and explore a model of coastal foredune growth and hummocky dune evolution—that is consistent with this previous work—to better understand the mechanisms behind the development of hummocky **foredunes in the alongshore direction**. Previous work by Moore et al (2016) has investigated the cross-shore dynamics. Our work here is a quantitative investigation of several of the hypotheses of Godfrey (1977), notably that **vegetation exerts a fundamental control on alongshore dune morphology**. Our findings suggest that, given no pre-existing template and sufficient time prior to occurrence of a storm event, **alongshore** hummocky dunes eventually **coalesce** to form a continuous coastal foredune ridge. Model results are well explained by a predictive rule for both the **coalescing timescale and the height of the coalesced dune that depend on the initial spatial distribution of dune vegetation** (which controls the location of incipient dunes), and the lateral and vertical growth rate of vegetation.”*

**We also include additional references to Godfrey in the introduction:**

**Page 2 Line 13-18:**

*“Geological and geomorphic templates have also been used to explain variability in dune height. Low areas without dunes can remain low because of shell or coarse-grained lags, a high water table that causes plant stress, **and/or climatic conditions such as cold temperatures prohibiting***

*plant growth (e.g., Mountney and Russell, 2006; 2009; Wolner et al., 2012; Ruz and Hesp, 2014; Ruz et al., 2017a). Godfrey (1977) hypothesized that barrier island orientation relative to the prevailing winds exerts a control on foredune morphology, with taller dunes occurring when winds blow directly onshore, perpendicular to the shoreline.”*

**Page 2 Line 23-31**

*“Ritchie and Penland (1988a, 1988b, 1990) developed a conceptual model of coastal foredune development following flattening of foredune topography by a storm, stating that a mature, continuous foredune can develop from a washover terrace given sufficient time. The transition from washover terrace (a low surface) to a continuous dune requires individual incipient dunes to grow and merge, eventually developing into a single continuous ridge. (Ritchie and Penland, 1988; 1990; Pye, 1983; Carter and Wilson 1990; Davidson-Arnott and Fisher, 1992; Mathew et al., 2010; Montreuil et al., 2013). Such a conceptual model, consistent with widely observed field conditions, **does not address** why some initially hummocky foredunes coalesce to a linear foredune ridge, while others remain hummocky, having variable dune height in the alongshore direction, **though Godfrey (1977) discussed the potential for recurring storm events to prevent the coalescing of hummocky dunes, even in locations where vegetation grows rapidly in the lateral direction.”***

**Page 3 Line 1-2:**

*“Our work here is a quantitative investigation of several of the hypotheses of Godfrey (1977), notably that vegetation exerts a fundamental control on alongshore dune morphology.”*

**We also add a citation to another Godfrey paper in the manuscript (Godfrey et al 1979)**

Last paragraph of paper: I suggest eliminating this paragraph because it implies that the model is not ready for use.

**To avoid this incorrect implication we have removed this paragraph and replaced it with the following sentence, which is meant to address how model findings can be tested in the field to yield further insight into potential implications:**

**Page 8; line 31-35:**

*“Although beyond the scope of this effort, observational work aimed at assessing the relationships among storm frequency/magnitude, species composition of dune-building vegetation and dune development (e.g., van Puijenbroek et al., 2017a; 2017b) will be useful in addressing the future implications of model results presented here as climate change is anticipated to alter each of these factors. “*
